# Supplementary material for: Tailoring interactions of carbon and sulfur in Li–S battery cathodes: significant effects of carbon–heteroatom bonds
Source: Royal Society of Chemistry journal article supplement (doi:10.1039/c4ta02007c), 2014-06-06
Supplement: c4ta02007c1.pdf [file c4ta02007c1.pdf]

### Supporting Information

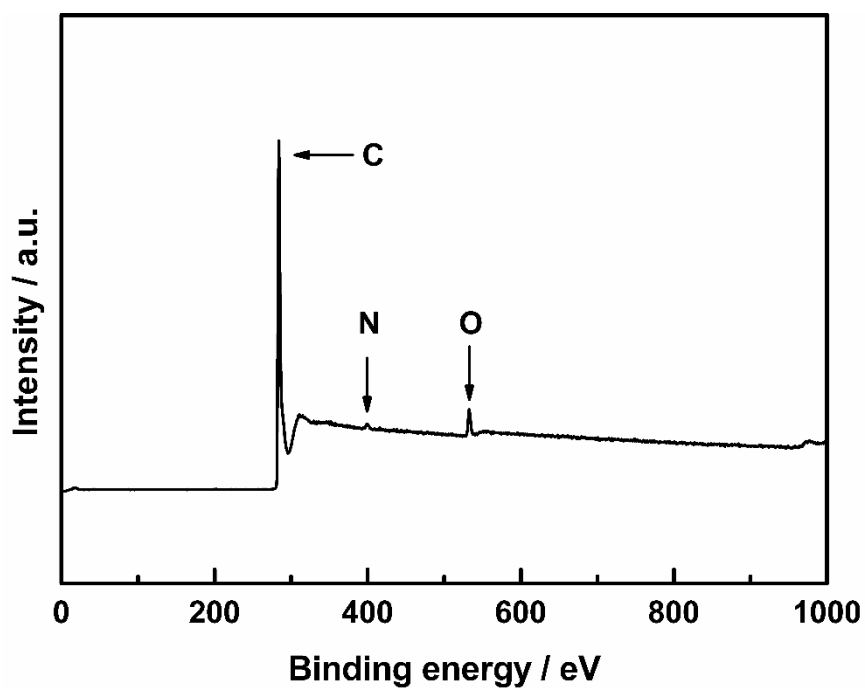

Fig. S1. XPS survey spectrum of N-N330

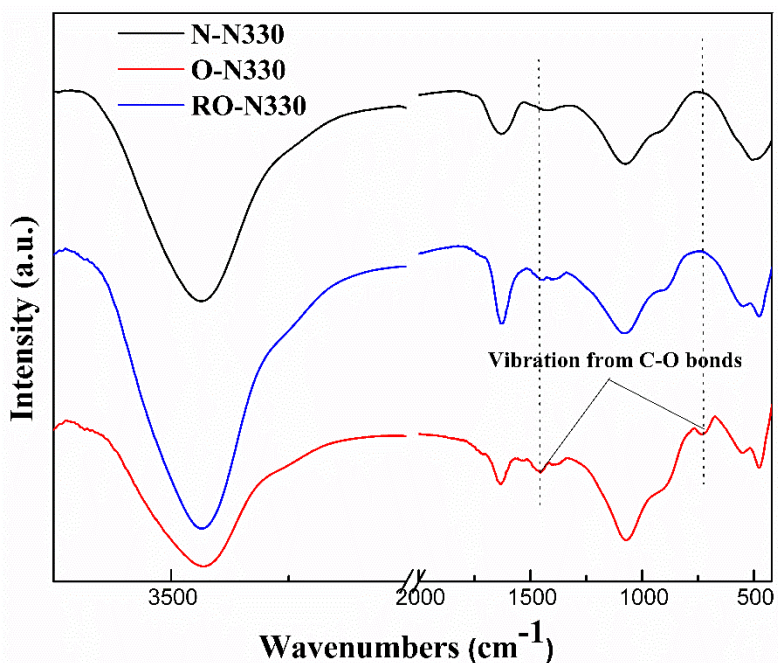

Fig. S2. FTIR spectra of as-prepared carbon blacks

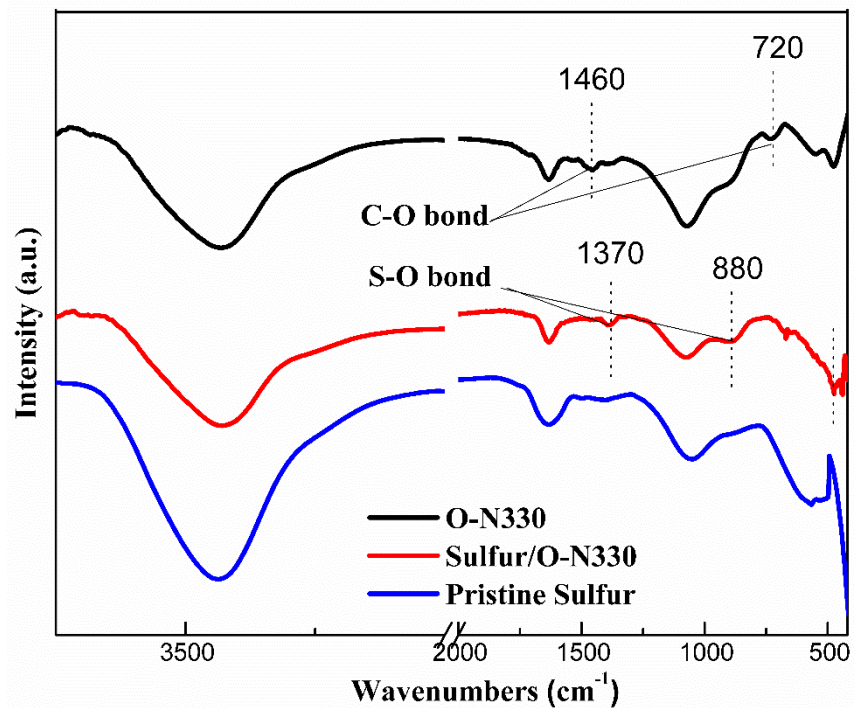

Fig. S3. FTIR spectra of O-N330, S/O-N330, and pristine sulfur

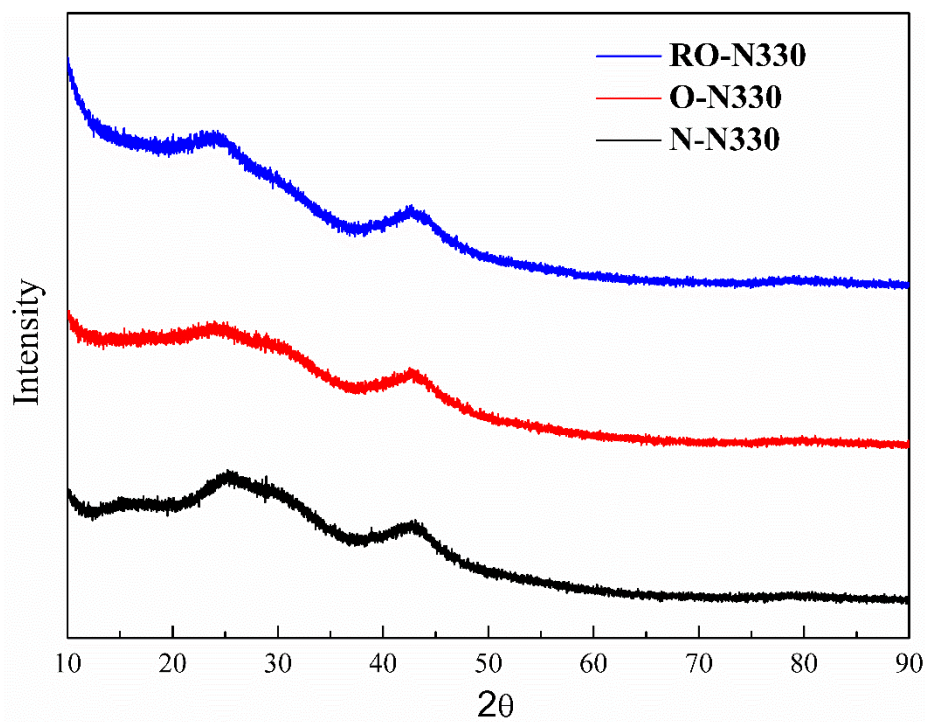

Fig. S4. XRD patterns of as-as prepared carbon blacks

Table S1. Surface information of carbon blacks treated by NH<sub>3</sub> with different mass loss

| <b>Reaction time<br/>(min)</b> | <b>Mass loss<br/>(wt%)</b> | <b>Specific Surface area<br/>(m<sup>2</sup>/g)</b> | <b>Specific surface area<br/>for mesopores<br/>(m<sup>2</sup>/g)</b> |
|--------------------------------|----------------------------|----------------------------------------------------|----------------------------------------------------------------------|
| 0                              | 0                          | 75.36                                              | 73.47                                                                |
| 1                              | 10                         | 233.13                                             | 87.28                                                                |
| 3                              | 50                         | 1053.49                                            | 650.54                                                               |
| 5                              | 75                         | 1230.61                                            | 975.28                                                               |
| 8                              | 85                         | 1358.27                                            | 1181.90                                                              |
